# Supplementary material for: A TLR4-independent critical role for CD14 in intracellular LPS sensing
Source: PubMed Central journal article supplement — Cell Rep. Author manuscript; Available in PMC 2022 Aug 15. (PMC9376664; doi:10.1016/j.celrep.2022.110755), 2022-05-03
Supplement: NIHMS1804976-supplement-1.pdf [file NIHMS1804976-supplement-1.pdf]

**Cell Reports, Volume 39**

**Supplemental information**

**A TLR4-independent critical role  
for CD14 in intracellular LPS sensing**

**Swathy O. Vasudevan, Ashley J. Russo, Puja Kumari, Sivapriya Kailasan Vanaja, and Vijay A. Rathinam**

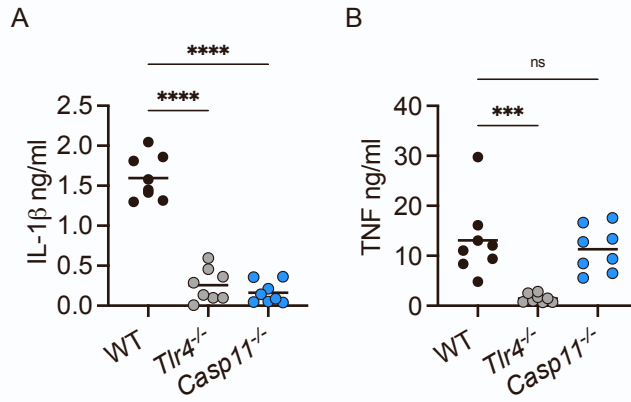

**Figure S1. Noncanonical inflammasome activation by LPS *in vivo* is caspase-11 and CD14-dependent.**

**(A and B)** Plasma IL-1 $\beta$  (A) and TNF (B) in IFN- $\gamma$  (1  $\mu$ g; 3 h)-primed mice 6 h post-LPS (20 mg/kg) injection. Each circle represents a mouse, and horizontal lines represent mean. Data from two experiments are shown. \*\*\* $p < 0.001$ ; \*\*\*\* $p < 0.0001$ ; ns: non-significant, one-way ANOVA/ Dunnett's test. Related to Figure 1.

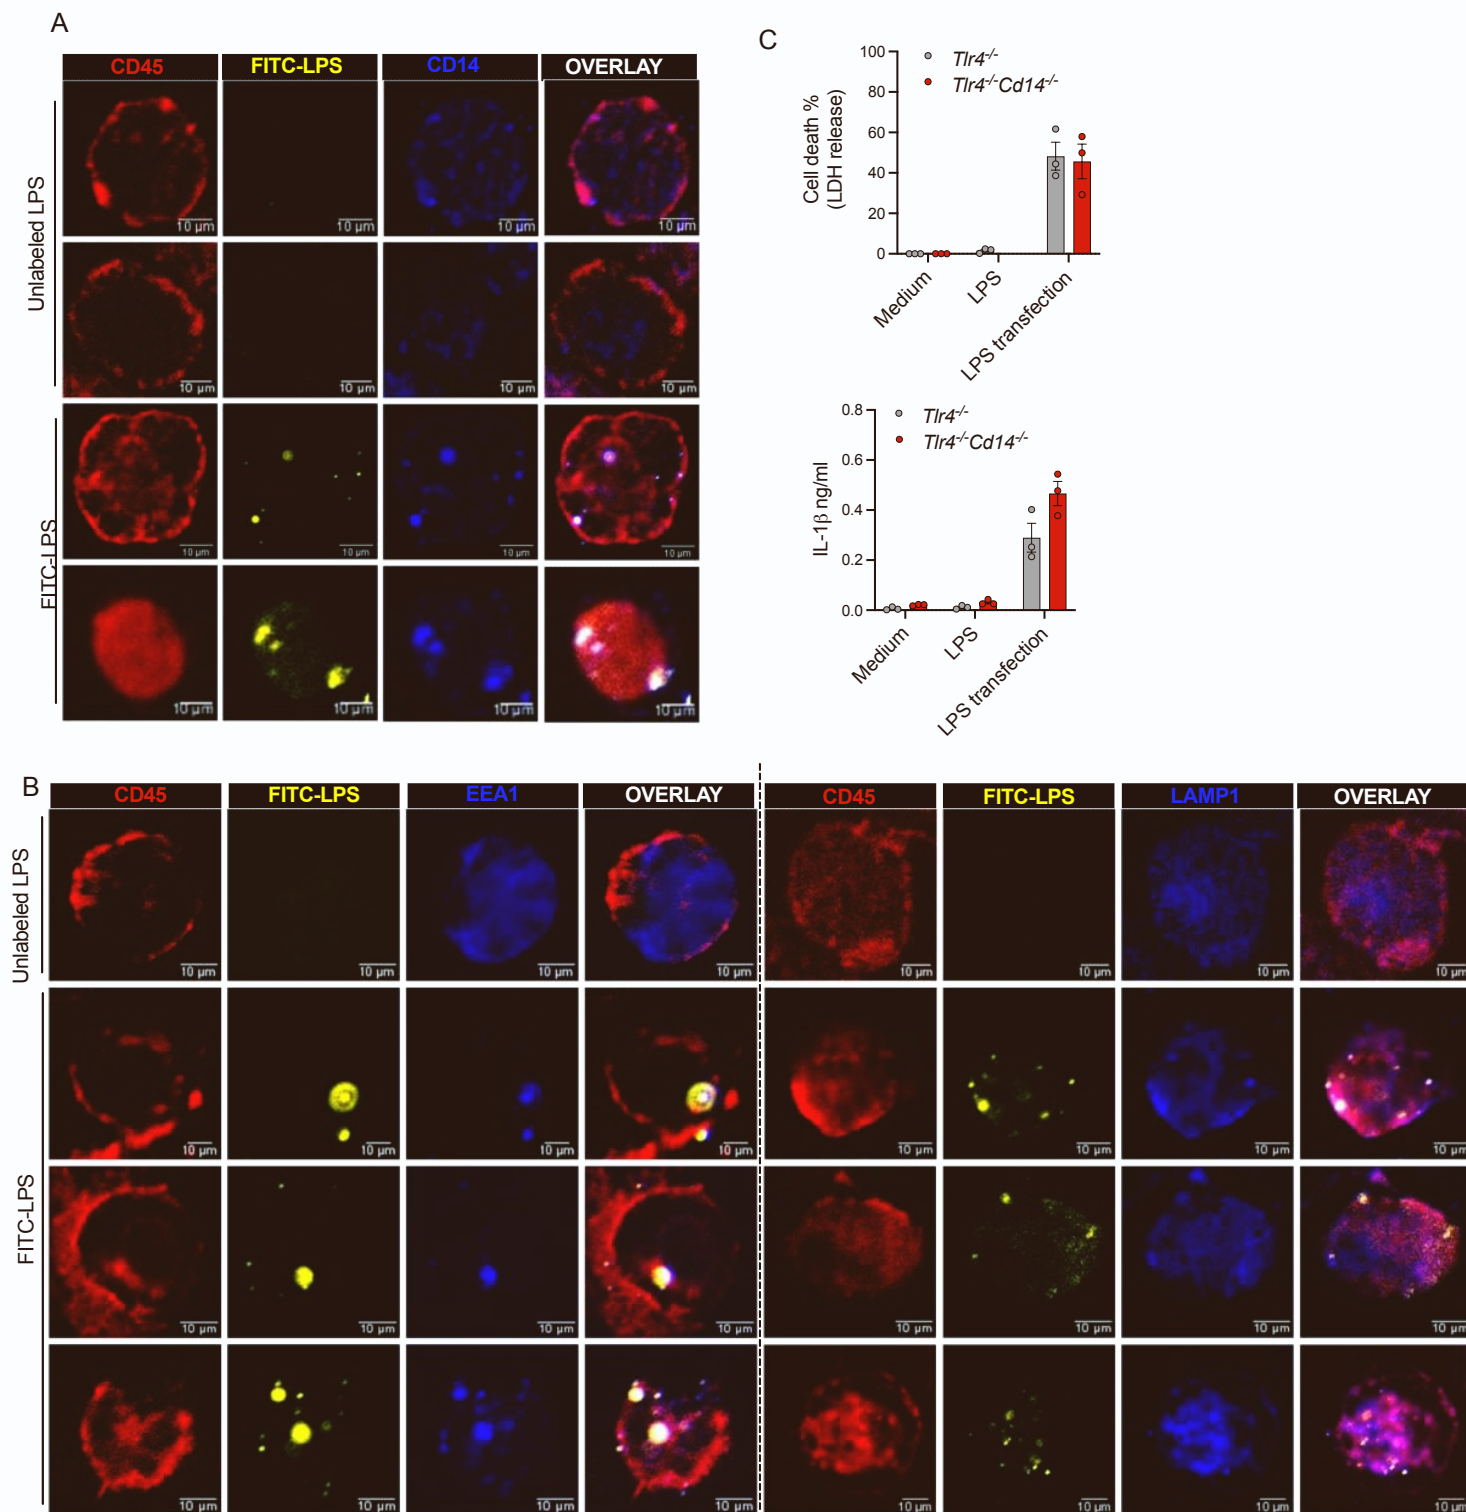

**Figure S2. CD14 is dispensable for LPS-transfection induced caspase-11 activation.**

(A and B) Confocal images of CD11b<sup>+</sup> myeloid cells from unlabeled LPS- or FITC-LPS-injected *Tlr4*<sup>-/-</sup> mice stained as indicated. Scale bar: 10 µm. (C) Cell death (LDH release) and IL-1β secretion by indicated BMDMs primed with 10 ng/ml IFN-γ and 0.5 µg/ml Pam3CSK4 for 3 h and stimulated for 16 h with 1 µg/ml LPS or transfected with 1 µg/ml LPS using lipofectamine 2000. Images representative of four experiments (A and B) and data from three experiments are shown (C). Data are presented as the mean ± s.e.m (C). Related to Figure 4.

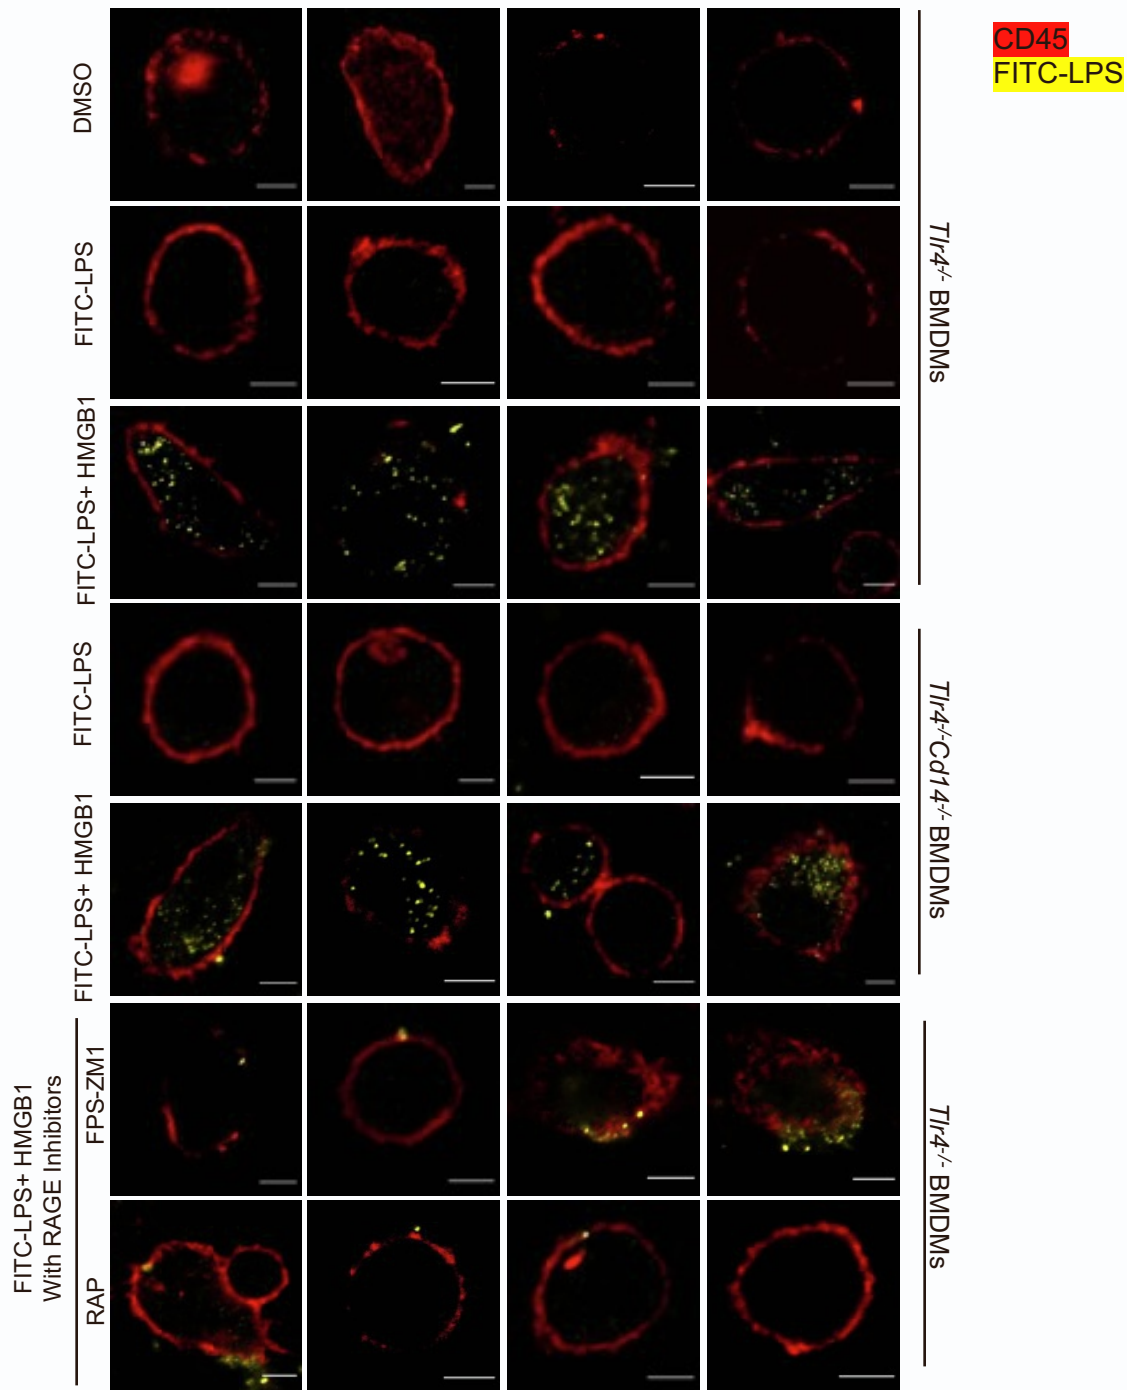

**Figure S3. CD14 is dispensable for HMGB1-mediated LPS internalization in BMDMs.**

Confocal images of indicated BMDMs pretreated with DMSO or RAGE inhibitors (1  $\mu$ M FPS-ZM1 or 10  $\mu$ M RAP), stimulated with FITC-LPS (100 ng/ml) or FITC-LPS (100 ng/ml) complexed with HMGB1 (400 ng/ml), and stained with anti-CD45 (red) and anti-FITC (yellow) antibodies. Scale bar: 5  $\mu$ M. Images representative of three experiments are shown. Related to Figure 4.

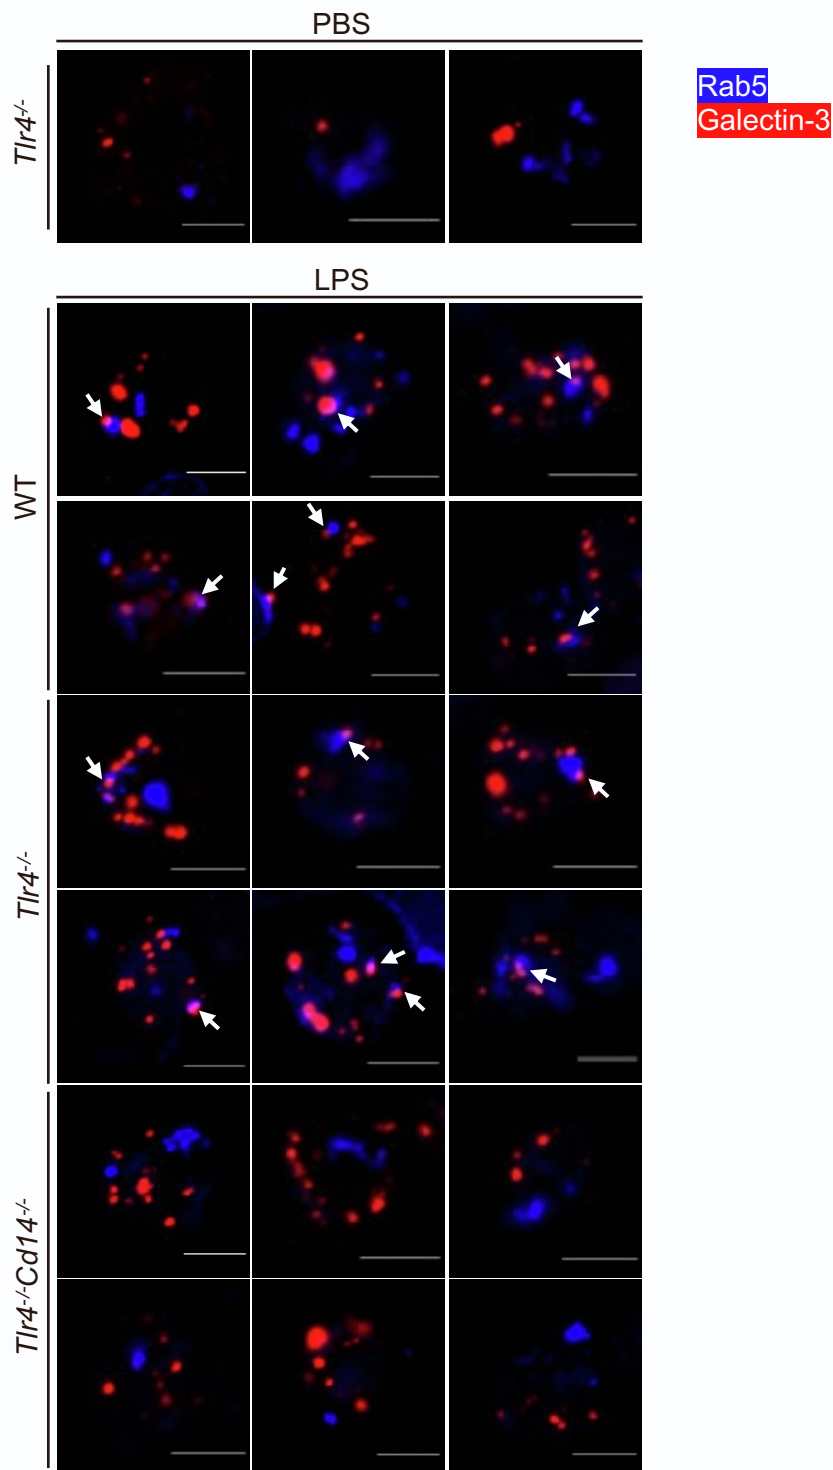

**Figure S4. Endosomal membrane disruption upon LPS internalization is CD14-dependent.**

Confocal images of CD11b<sup>+</sup> myeloid cells from PBS- or LPS (25 mg/kg)-injected WT, *Tlr4*<sup>-/-</sup> and *Tlr4*<sup>-/-</sup> *Cd14*<sup>-/-</sup> mice stained for Rab5 (blue) and galectin-3 (red). Scale bar: 5  $\mu$ M. White arrows indicate the colocalization of Rab5<sup>+</sup> compartments and galectin-3. Images representative of three experiments are shown. Related to Figure 4.
